# Supplementary material
Source: PubMed Central journal article supplement (PMC6501819)

## Supplemental Materials

*Association of an HDL apolipoproteomic score with the presence of coronary atherosclerosis and incident cardiovascular death*

### Table of Contents

|                                                                                                                                                              |    |
|--------------------------------------------------------------------------------------------------------------------------------------------------------------|----|
| Supplementary Table 1. Baseline characteristics                                                                                                              | 2  |
| Supplementary Table 2. Multivariable association of cardiovascular risk factors, including plasma lipids, with pCAD.                                         | 3  |
| Supplementary Table 3. Multivariable association of cardiovascular risk factors, including plasma apoA-1 and apoB, with pCAD.                                | 4  |
| Supplementary Table 4. Association statistics for pCAD with varying degrees of angiographic CAD severity.                                                    | 5  |
| Supplementary Table 5. Optimal cut-off points for pCAD across varying degrees of angiographic CAD severity.                                                  | 6  |
| Supplementary Table 6. Multivariable association of HDL apolipoproteins with angiographic CAD.                                                               | 7  |
| Supplementary Table 7. C-statistics for the presence of CAD across clinical CAD risk factors, plasma apolipoproteins, and pCAD.                              | 8  |
| Supplementary Table 8. Multivariable model fit metrics with and without the presence of pCAD.                                                                | 9  |
| Supplementary Table 9. Multivariable association of pCAD with incident cardiovascular mortality.                                                             | 10 |
| Supplementary Table 10. Multivariable association of HDL apolipoproteins with incident cardiovascular mortality.                                             | 11 |
| Supplementary Figure 1. Distribution of pCAD in the CASABLANCA study.                                                                                        | 12 |
| Supplementary Figure 2. Pairwise correlation of HDL proteins, including composite pCAD score.                                                                | 13 |
| Supplementary Figure 3. Effect of in vitro heparin administration to pCAD scores.                                                                            | 14 |
| Supplementary Figure 4. pCAD distributions among those with obstructive CAD by plasma apoA-1 quantile, diabetes mellitus, and incident cardiovascular death. | 15 |

**Supplementary Table 1. Baseline characteristics**

| Characteristic                 | Value              |
|--------------------------------|--------------------|
| Age, y                         | 66.6 (11.3)        |
| Female sex                     | 267 (28.3%)        |
| Ethnicity                      |                    |
| Caucasian                      | 884 (93.7%)        |
| African                        | 22 (2.3%)          |
| Asian / Pacific                | 11 (1.2%)          |
| Hispanic                       | 19 (2.0%)          |
| Native American                | 2 (0.2%)           |
| Other / Unknown                | 5 (0.5%)           |
| Current smoker                 | 118 (12.5%)        |
| Hypertension                   | 692 (73.4%)        |
| Coronary artery disease        | 481 (51.0%)        |
| Prior myocardial infarction    | 226 (24.0%)        |
| Prior CVA/TIA                  | 95 (10.1%)         |
| Diabetes mellitus              | 237 (25.1%)        |
| Systolic blood pressure, mmHg  | 136.8 (22.4)       |
| Diastolic blood pressure, mmHg | 72.9 (11.5)        |
| Plasma lipids, mg/dL           |                    |
| Total cholesterol              | 152.6 (37.8)       |
| LDL cholesterol                | 83.9 (31.7)        |
| HDL cholesterol                | 45.4 (15.6)        |
| Triglycerides                  | 102.0 (75.0-141.5) |
| Apolipoprotein A1, mg/dL       | 127.9 (27.4)       |
| Apolipoprotein B, mg/dL        | 85.4 (24.2)        |
| hsCRP, mg/L                    | 2.5 (1.0-5.4)      |
| Statin prescription            | 667 (71.1%)        |

Continuous variables are presented as mean (standard deviation) and categorical variables are presented as count (percentage). Plasma lipids and biomarkers were sampled at the time of angiography. Coronary artery disease was defined by prevalent clinical status prior to diagnostic coronary angiography.

\* Triglycerides and hsCRP are represented as median (interquartile range)

**Supplementary Table 2. Multivariable association of cardiovascular risk factors, including plasma lipids, with pCAD**

| Parameter                      | Parameter estimate | Standard error | <i>P</i> |
|--------------------------------|--------------------|----------------|----------|
| Age                            | -0.0083            | 0.027          | 0.76     |
| Male sex                       | -0.048             | 0.057          | 0.39     |
| Statin prescription            | 0.15               | 0.057          | 0.009    |
| Diabetes mellitus              | 0.24               | 0.058          | <0.001   |
| Current smoker                 | -0.10              | 0.080          | 0.17     |
| Systolic blood pressure (mmHg) | -0.073             | 0.025          | 0.004    |
| History of hypertension        | 0.083              | 0.059          | 0.163    |
| HDL cholesterol                | -0.64              | 0.026          | <0.001   |
| Non-HDL cholesterol            | 0.060              | 0.027          | 0.025    |

Continuous variables are standardized to mean = 0 and standard deviation = 1.

**Supplementary Table 3. Multivariable association of cardiovascular risk factors, including plasma apoA-1 and apoB, with pCAD**

| <b>Parameter</b>               | <b>Parameter estimate</b> | <b>Standard error</b> | <b><i>P</i></b> |
|--------------------------------|---------------------------|-----------------------|-----------------|
| Age                            | -0.026                    | 0.027                 | 0.34            |
| Male sex                       | -0.051                    | 0.058                 | 0.38            |
| Statin prescription            | 0.28                      | 0.058                 | <0.001          |
| Diabetes mellitus              | 0.23                      | 0.059                 | <0.001          |
| Current smoker                 | -0.13                     | 0.077                 | 0.088           |
| Systolic blood pressure (mmHg) | -0.061                    | 0.026                 | 0.019           |
| History of hypertension        | 0.14                      | 0.061                 | 0.018           |
| Log(apoA-1)                    | -0.61                     | 0.027                 | <0.001          |
| Log(apoB)                      | 0.21                      | 0.027                 | <0.001          |

Continuous variables are standardized to mean = 0 and standard deviation = 1.

**Supplementary Table 4. Association statistics for pCAD with varying degrees of angiographic CAD severity**

| CAD severity                 | N (%)       | Model 1 |           |        | Model 2 |           |       |
|------------------------------|-------------|---------|-----------|--------|---------|-----------|-------|
|                              |             | OR      | 95% CI    | P      | OR      | 95% CI    | P     |
| ≥30% lesion in<br>≥1 vessel  | 736 (78.0%) | 1.60    | 1.36-1.88 | <0.001 | 1.45    | 1.15-1.82 | 0.002 |
| ≥50% lesion in<br>≥1 vessel  | 650 (68.9%) | 1.56    | 1.35-1.81 | <0.001 | 1.34    | 1.09-1.64 | 0.006 |
| ≥70% lesion in<br>≥1 vessel  | 587 (62.2%) | 1.64    | 1.42-1.90 | <0.001 | 1.39    | 1.14-1.69 | 0.001 |
| ≥70% lesion in<br>≥2 vessels | 340 (36.1%) | 1.65    | 1.42-1.92 | <0.001 | 1.40    | 1.14-1.73 | 0.002 |

Model 1 represents univariate analyses. Model 2 represents multivariable analysis, adjusted for age, sex, statin prescription, diabetes mellitus, smoking status, systolic blood pressure, hypertension, log(apoA-1), and log(apoB).

**Supplementary Table 5. Optimal cut-off points for pCAD across varying degrees of angiographic CAD severity**

| CAD severity              | N Correctly Predicted Cases | N Correctly Predicted Non-Cases | N Non-Cases Predicted as Cases | N Cases Predicted as Non-Cases | Sensitivity | Specificity | Optimal cut point | Youden value |
|---------------------------|-----------------------------|---------------------------------|--------------------------------|--------------------------------|-------------|-------------|-------------------|--------------|
| ≥30% lesion in ≥1 vessel  | 476                         | 123                             | 79                             | 260                            | 64.7%       | 60.9%       | 1.26              | 0.26         |
| ≥50% lesion in ≥1 vessel  | 434                         | 167                             | 121                            | 216                            | 66.80%      | 58.80%      | 1.26              | 0.25         |
| ≥70% lesion in ≥1 vessel  | 404                         | 200                             | 151                            | 183                            | 68.8%       | 57.0%       | 1.26              | 0.26         |
| ≥70% lesion in ≥2 vessels | 251                         | 301                             | 297                            | 89                             | 73.8%       | 50.3%       | 1.27              | 0.24         |

**Supplementary Table 6. Multivariable association of HDL apolipoproteins with angiographic CAD.**

| Parameter                      | Parameter estimate | Standard error | <i>P</i> |
|--------------------------------|--------------------|----------------|----------|
| HDL apoA-1                     | -0.17              | 0.18           | 0.33     |
| HDL apoC-1                     | -0.45              | 0.16           | 0.004    |
| HDL apoC-2                     | 0.10               | 0.18           | 0.58     |
| HDL apoC-3                     | 0.10               | 0.13           | 0.47     |
| HDL apoC-4                     | 0.17               | 0.13           | 0.18     |
| Age                            | 0.30               | 0.08           | 0.0004   |
| Male sex                       | 1.03               | 0.18           | <0.0001  |
| Statin prescription            | 0.60               | 0.17           | 0.0005   |
| Diabetes mellitus              | 0.56               | 0.19           | 0.003    |
| Current smoker                 | 0.36               | 0.24           | 0.13     |
| Systolic blood pressure (mmHg) | 0.04               | 0.08           | 0.60     |
| History of hypertension        | 0.28               | 0.18           | 0.11     |
| Log(apoA-1)                    | 0.004              | 0.16           | 1.00     |
| Log(apoB)                      | -0.01              | 0.09           | 0.99     |

Continuous variables are standardized to mean = 0 and standard deviation = 1.

**Supplementary Table 7. C-statistics for the presence of CAD across clinical CAD risk factors, plasma apolipoproteins, and pCAD.**

| <b>Variable</b>         | <b>C-statistic (95% CI)</b> | <b>C-statistic difference versus pCAD (95% CI)</b> | <b>P for C-statistic difference</b> |
|-------------------------|-----------------------------|----------------------------------------------------|-------------------------------------|
| Age                     | 0.57 (0.53-0.61)            | -0.063 (-0.12- -0.0065)                            | 0.029                               |
| Sex                     | 0.61 (0.58-0.64)            | -0.022 (-0.070-0.025)                              | 0.36                                |
| Statin                  | 0.59 (0.56-0.62)            | -0.039 (-0.086-0.0085)                             | 0.11                                |
| Diabetes mellitus       | 0.57 (0.54-0.60)            | -0.060 (-0.10- -0.018)                             | 0.0054                              |
| Smoker                  | 0.51 (0.49-0.53)            | -0.12 (-0.17- -0.080)                              | <0.0001                             |
| Systolic blood pressure | 0.52 (0.48-0.56)            | -0.11 (-0.16- -0.052)                              | 0.0002                              |
| Hypertension            | 0.57 (0.54-0.60)            | -0.065 (-0.11- -0.020)                             | 0.0051                              |
| Log(ApoB)               | 0.55 (0.51-0.58)            | -0.085 (-0.14- -0.029)                             | 0.0030                              |
| Log(ApoA1)              | 0.61 (0.58-0.65)            | -0.016 (-0.050-0.018)                              | 0.35                                |
| pCAD                    | 0.63 (0.59-0.67)            | NA                                                 | NA                                  |

**Supplementary Table 8. Multivariable model fit metrics with and without the presence of pCAD**

| Criterion         | Intercept Only | Intercept and Covariates |
|-------------------|----------------|--------------------------|
| <b>Model 1</b>    |                |                          |
| AIC               | 1194.069       | 1072.531                 |
| SC                | 1198.875       | 1125.394                 |
| -2 Log Likelihood | 1192.069       | 1050.531                 |
| <b>Model 2</b>    |                |                          |
| AIC               | 1194.069       | 1081.268                 |
| SC                | 1198.875       | 1129.325                 |
| -2 Log Likelihood | 1192.069       | 1061.268                 |

Model 1 represents multivariable analysis, adjusted for age, sex, statin prescription, diabetes mellitus, smoking status, systolic blood pressure, hypertension, log(apoA-1), and log(apoB). Model 2 represents multivariable analysis, adjusted for age, sex, statin prescription, diabetes mellitus, smoking status, systolic blood pressure, hypertension, log(apoA-1), log(apoB), and pCAD.

AIC = Akaike Information Criteria; HDL = high-density lipoprotein; SC = Schwarz Criterion

**Supplementary Table 9. Multivariable association of pCAD with incident cardiovascular mortality**

| Parameter                      | All              |         | Without CAD       |        | With CAD         |         |
|--------------------------------|------------------|---------|-------------------|--------|------------------|---------|
|                                | HR (95% CI)      | P       | HR (95% CI)       | P      | HR (95% CI)      | P       |
| Age                            | 2.55 (1.98-3.28) | <0.0001 | 2.85 (1.55-5.23)  | 0.0008 | 2.51 (1.89-3.33) | <0.0001 |
| Male sex                       | 1.05 (0.66-1.68) | 0.84    | 1.16 (0.41-3.33)  | 0.78   | 0.93 (0.55-1.58) | 0.80    |
| Statin prescription            | 0.85 (0.53-1.37) | 0.51    | 0.48 (0.18-1.29)  | 0.15   | 1.00 (0.55-1.80) | 0.99    |
| Diabetes mellitus              | 2.33 (1.51-3.60) | 0.0001  | 7.01 (2.43-20.24) | 0.0003 | 1.76 (1.08-2.86) | 0.023   |
| Current smoker                 | 1.68 (0.89-3.18) | 0.11    | 0 (0,)            | 1.00   | 2.12 (1.09-4.11) | 0.027   |
| Systolic blood pressure (mmHg) | 0.67 (0.53-0.85) | 0.0007  | 0.66 (0.37-1.17)  | 0.16   | 0.68 (0.53-0.88) | 0.0029  |
| History of hypertension        | 1.34 (0.76-2.35) | 0.31    | 1.21 (0.40-3.69)  | 0.74   | 1.41 (0.73-2.72) | 0.31    |
| Log(apoA-1)                    | 1.03 (0.78-1.34) | 0.86    | 0.86 (0.41-1.76)  | 0.67   | 1.14 (0.85-1.54) | 0.38    |
| Log(apoB)                      | 0.99 (0.79-1.25) | 0.94    | 1.01 (0.67-1.51)  | 0.97   | 0.96 (0.72-1.27) | 0.75    |
| Prevalent CAD                  | 1.28 (0.75-2.20) | 0.36    | NA                | NA     | NA               | NA      |
| HDL pCAD                       | 1.24 (0.93-1.66) | 0.15    | 0.75 (0.38-1.49)  | 0.42   | 1.48 (1.07-2.05) | 0.019   |

CAD is defined as the presence of coronary artery stenosis ( $\geq 70\%$  luminal obstruction in at least one major coronary artery).

**Supplementary Table 10. Multivariable association of HDL apolipoproteins with incident cardiovascular mortality**

| Parameter                      | All              |         | Without CAD       |        | With CAD         |         |
|--------------------------------|------------------|---------|-------------------|--------|------------------|---------|
|                                | HR (95% CI)      | P       | HR (95% CI)       | P      | HR (95% CI)      | P       |
| HDL apoA-1                     | 1.02 (0.65-1.60) | 0.93    | 1.28 (0.35-4.70)  | 0.71   | 0.89 (0.53-1.49) | 0.66    |
| HDL apoC-1                     | 1.00 (0.68-1.48) | 1.00    | 2.41 (0.80-7.23)  | 0.12   | 0.97 (0.64-1.48) | 0.89    |
| HDL apoC-2                     | 0.98 (0.62-1.56) | 0.95    | 0.11 (0.03-0.52)  | 0.005  | 1.35 (0.79-2.29) | 0.27    |
| HDL apoC-3                     | 1.82 (1.44-2.30) | <0.0001 | 2.38 (1.48-3.82)  | 0.0003 | 1.60 (1.16-2.22) | 0.004   |
| HDL apoC-4                     | 0.79 (0.56-1.12) | 0.19    | 1.23 (0.50-3.03)  | 0.65   | 0.76 (0.51-1.13) | 0.18    |
| Age                            | 2.51 (1.95-3.22) | <0.0001 | 3.36 (1.70-6.63)  | 0.0005 | 2.46 (1.86-3.25) | <0.0001 |
| Male sex                       | 1.18 (0.72-1.96) | 0.51    | 1.39 (0.42-4.62)  | 0.59   | 1.10 (0.62-1.94) | 0.75    |
| Statin prescription            | 0.93 (0.57-1.53) | 0.78    | 0.44 (0.15-1.29)  | 0.13   | 1.19 (0.64-2.18) | 0.59    |
| Diabetes mellitus              | 2.18 (1.40-3.40) | 0.0006  | 5.74 (1.69-19.56) | 0.005  | 1.78 (1.09-2.90) | 0.02    |
| Current smoker                 | 1.80 (0.95-3.42) | 0.07    | 0 (0,0)           | 1.00   | 2.23 (1.14-4.34) | 0.02    |
| Systolic blood pressure (mmHg) | 0.68 (0.54-0.86) | 0.001   | 0.72 (0.43-1.19)  | 0.72   | 0.71 (0.55-0.91) | 0.008   |
| History of hypertension        | 1.25 (0.71-2.20) | 0.44    | 1.03 (0.31-3.39)  | 1.03   | 1.26 (0.65-2.44) | 0.50    |
| Log(apoA-1)                    | 0.68 (0.47-0.99) | 0.04    | 0.63 (0.19-2.06)  | 0.44   | 0.71 (0.46-1.10) | 0.12    |
| Log(apoB)                      | 1.05 (0.82-1.33) | 0.71    | 1.12 (0.70-1.78)  | 0.64   | 1.02 (0.76-1.37) | 0.91    |
| Prevalent CAD                  | 1.34 (0.79-2.29) | 0.28    | NA                | NA     | NA               | NA      |

CAD is defined as the presence of coronary artery stenosis ( $\geq 70\%$  luminal obstruction in at least one major coronary artery).

**Supplementary Figure 1. Distribution of pCAD in the CASABLANCA study**

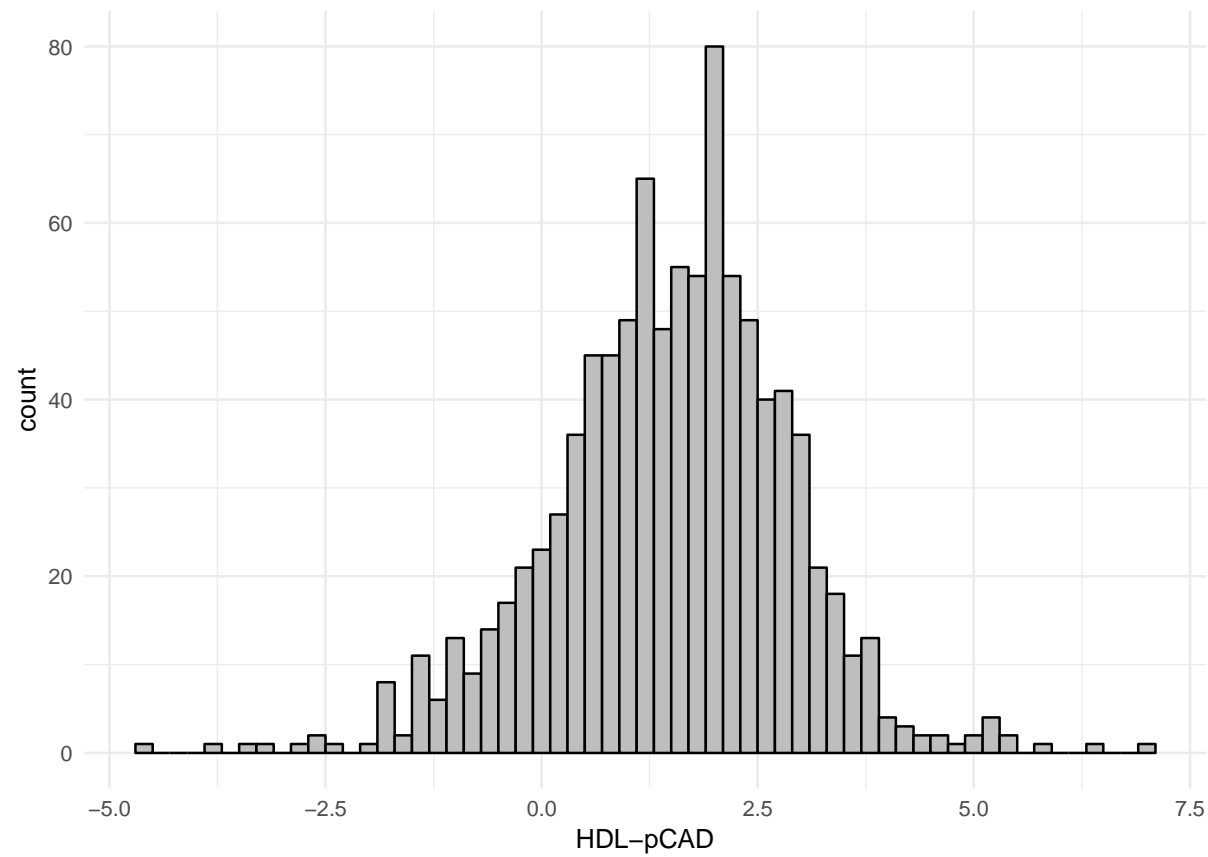

**Supplementary Figure 2. Pairwise correlation of HDL proteins, including composite pCAD score**

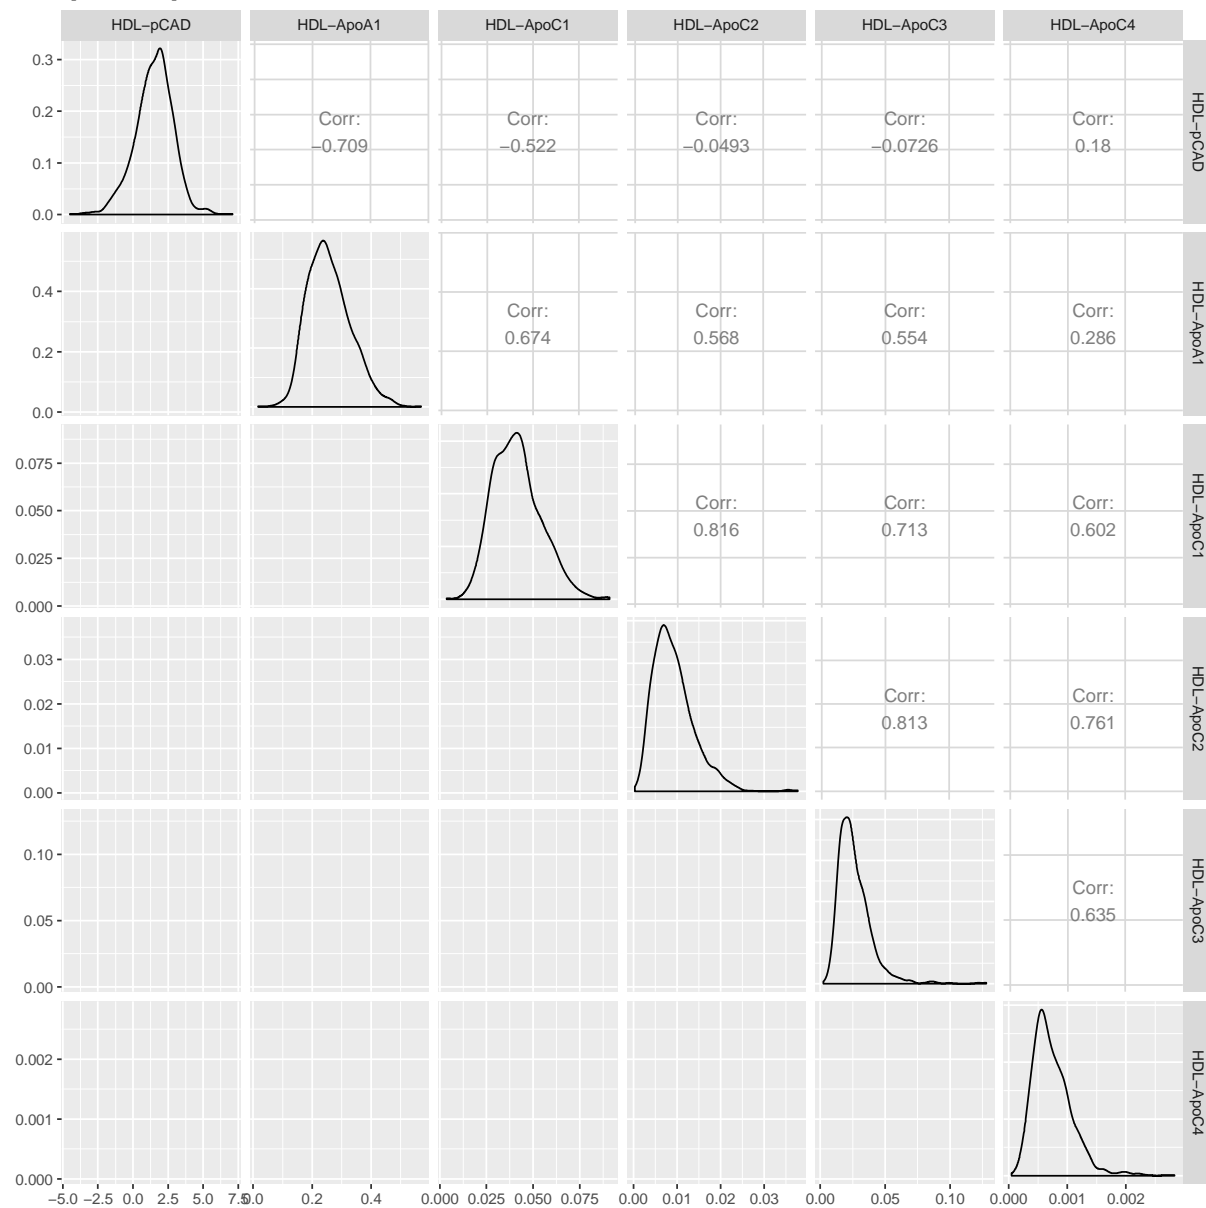

Density plots and pairwise correlations of each of the HDL proteins and composite pCAD score are depicted, including Pearson correlation coefficients.

Supplementary Figure 3. Effect of *in vitro* heparin administration to pCAD scores.

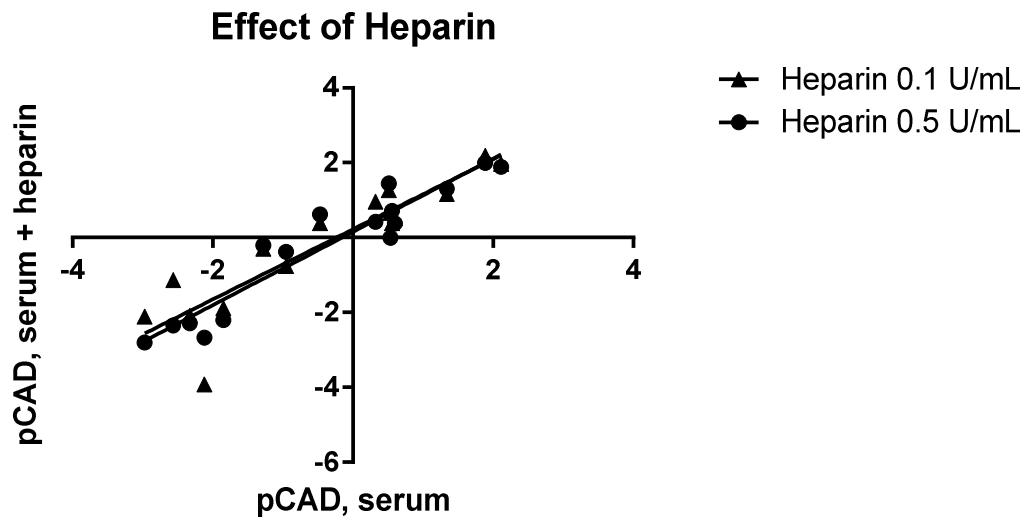

Across 17 serum samples representing a range of pCAD values, the influence of *in vitro* heparin supplementation was assessed. Heparin was administered at two doses – 0.1 U/mL (triangles in plot) and 0.5 U/mL (circles in plot).

**Supplementary Figure 3. pCAD distributions among those with obstructive CAD by plasma apoA-1 quantile, diabetes mellitus, and incident cardiovascular death**

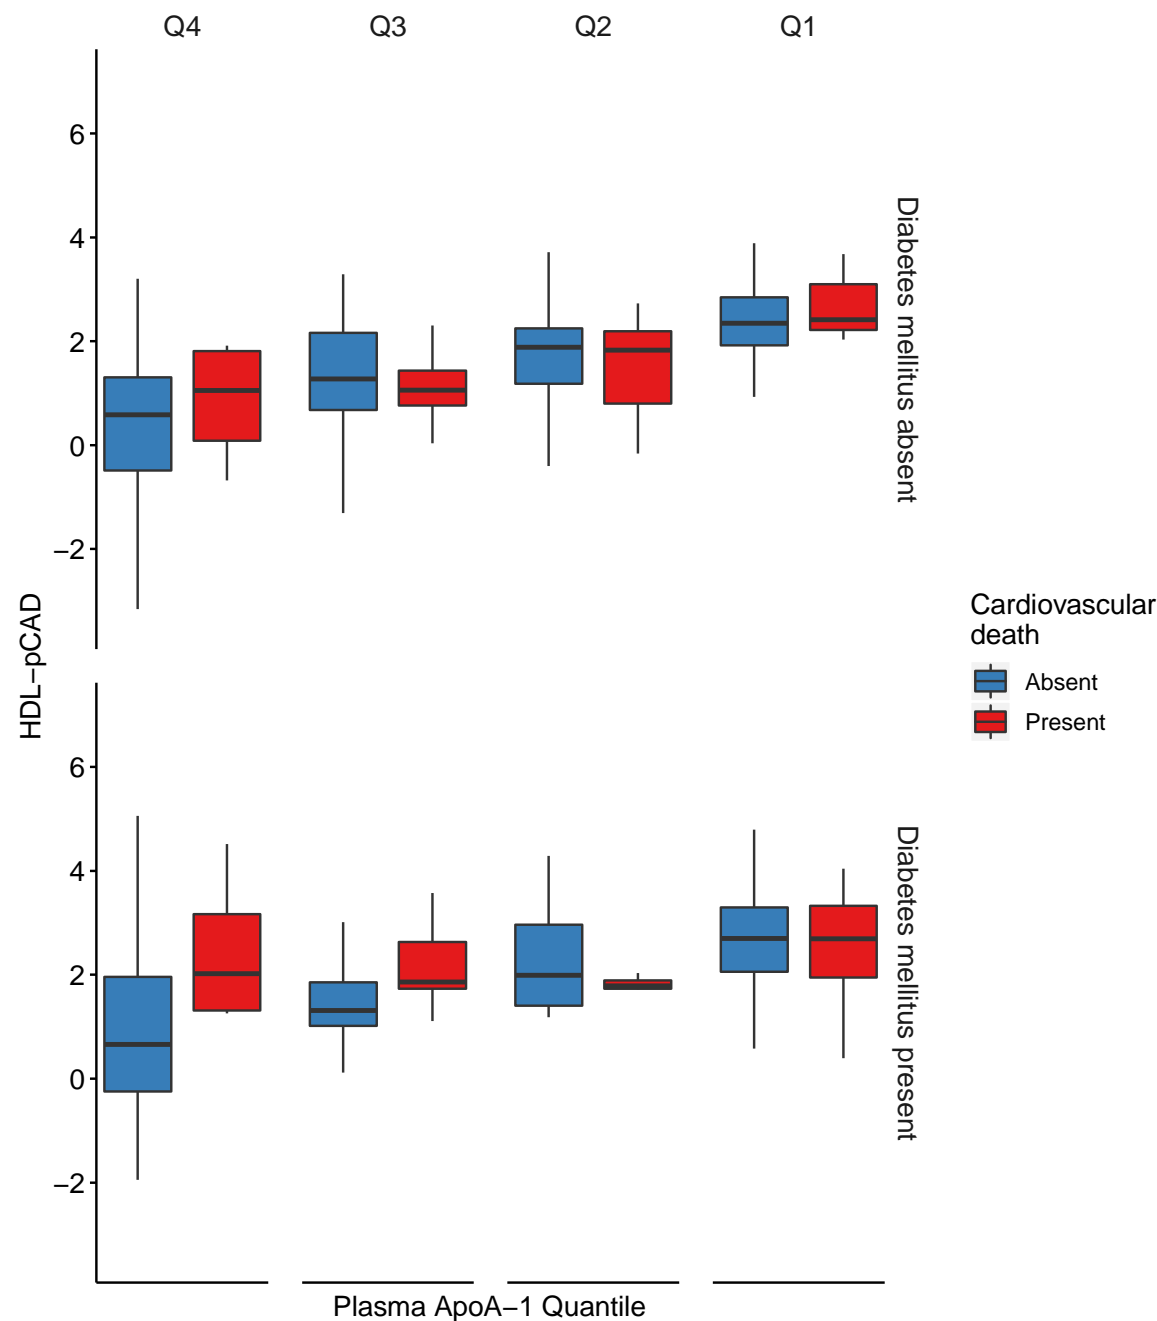

Supplement: NIHMS1523881-supplement-1.pdf [file NIHMS1523881-supplement-1.pdf]
